# Supplementary material for: Overlap chronic GVHD is associated with adverse survival outcomes compared to classic chronic GVHD
Source: Research Square preprint supplement (doi:10.21203/rs.3.rs-3243208/v1), 2023-08-21
Supplement: Supplementary file 1 [file 10e940a9740e8bbfa3b79fb4.xlsx]

## Sheet: supp table 2
Supplemental Table 2. Cause of death (COD) for patients with chronic GVHD.
Blinded Patient ID	cGVHD	cGVHD severity at diagnosis	Day of cGVHD onset	Day of death	Cause of death (COD)
4	Overlap	Moderate	117	675	Relapsed disease
11	Overlap​	Severe	134​	228​	Acute GVHD; infection​
13	Overlap	Severe	181	847	Disease relapse
18	Overlap​	Severe	315​	349​	Chronic GVHD​
36	Overlap​	Severe	170​	443​	GVHD/respiratory failure​
38	Overlap	Severe	266	1013	Disease relapse, renal failure
91	Overlap​	Severe	194​	221​	Respiratory failure/hemorrhagic shock from GI bleed​
101	Overlap​	Severe	224​	302​	GVHD; Multiorgan failure
117	Overlap	mild	210	666	Disease relapse
148	Overlap​	Severe	148​	435​	Bronchiolitis obliterans syndrome
158	Overlap​	Severe	266​	311​	Liver GVHD​
159	Overlap​	Severe	153​	301​	Liver GVHD​
26	Classic	Moderate	166	957	Disease relapse
27	Classic​	Mild	154​	939​	Stroke​
29	Classic	Moderate	269	1158	Disease relapse
30	Classic​	Mild	213​	678​	Sepsis​
32	Classic​	Moderate	336​	770​	Pneumonia​
83	Classic​	Moderate	271​	424​	Hemorrhagic shock; bleeding jejunal hematoma, jejunal perforations
95	Classic​	Moderate	236​	979​	Bronchiolitis obliterans
129	Classic	Moderate	272	1520	Respiratory failure; Kidney failure
135	Classic​	Severe	308​	505​	Infections: influenza, parainfluenza,aspergillus​
