# Supplementary material for: Overlap chronic GVHD is associated with adverse survival outcomes compared to classic chronic GVHD
Source: Research Square preprint supplement (doi:10.21203/rs.3.rs-3243208/v1), 2023-08-21
Supplement: Supplementary file 2 [file 3dc3d3829d270644a84e423e.xlsx]

## Sheet: Table 1
Table 1. Baseline characteristics of ABA2 participants with chronic GVHD.
Characteristic Total N =92	Classic cGVHD N=57 (62% of patients with cGVHD)	ocGVHD N=35 (38% of patients with cGVHD)	P value
Age, median years (range)	37.1 (7.9 – 76.2)	54.5 (7.0 – 76.5)	0.02
Age group, no. (%)			0.602
Pediatric (age < 21)	13 (22.8)	6 (17.1)
Adult (age ≥21)	44 (77.2)	29 (82.9)
Time to cGVHD diagnosis, median days from transplant (range)	220 (43 – 364)	191 (108 – 349)	0.0516
Treatment group, no. (%)			0.59
8/8 Aba	22 (38.6)	14 (40)
8/8 Placebo	20 (35.1)	9 (25.7)
7/8 Aba	15 (26.3)	12 (34.3)
Performance Score > 90%, no. (%)	42 (73.7)	27 (77.1)	0.81
Onset of cGVHD, no. (%)			<0.001
Quiescent	39 (68.4)	14 (40)
De novo	17 (29.8)	4 (11.4)
Progressive	1 (1.8)	17 (48.6)
Disease, no. (%)			0.85
AML	23 (40.4)	11 (31.4)
ALL	17 (29.8)	10 (28.6)
CML	3 (5.3)	2 (5.7)
MDS	12 (21.1)	10 (28.6)
HL	0 (0)	0 (0)
Other	2 (3.5)	2 (5.7)
Conditioning regimen, no. (%)			0.11
Busulfan/Fludarabine	6 (10.5)	0 (0)
Busulfan/cyclophosphamide	24 (42.1)	14 (40)
TBI/ cyclophosphamide	18 (31.6)	10 (28.6)
Fludarabine/Melphalan	9 (15.8)	11 (31.4)
Conditioning intensity, no. (%)			0.12
Myeloablative	48 (84.2)	24 (68.6)
Reduced intensity	9 (15.8)	11 (31.4)
Graft type, no. (%)			0.82
Peripheral blood	37 (64.9)	24 (68.6)
Bone marrow	20 (35.1)	11 (31.4)
