# Supplementary material for: Overlap chronic GVHD is associated with adverse survival outcomes compared to classic chronic GVHD
Source: Research Square preprint supplement (doi:10.21203/rs.3.rs-3243208/v1), 2023-08-21
Supplement: Supplementary file 3 [file 512dfa1848b69e1dc90b3c88.xlsx]

## Sheet: Table 2
Table 2. Comparison of the involved cGVHD organ systems between classic cGVHD and ocGVHD at the time of initial presentation (Table 2A) and at maximum severity of cGVHD (Table 2B).
	classic cGVHD, no. (%)	ocGVHD, no. (%)	p-value*
Number of patients with cGVHD subtype (% of patients with cGVHD subtype compared to total number with cGVHD)	57 (62%)	35 (38%)
Table 2A: At time of presentation
Skin	21 (37)	30 (86)	<0.001a
Grade 1	10 (18)	10 (29)
Grade 2	6 (11)	10 (29)
Grade 3	5 (9)	10 (29)
Mouth	47 (82)	28 (80)	0.79b
Eyes	22 (39)	16 (46)	0.52 b
GI	14 (25)	19 (54)	0.002a
Grade 1	7 (12)	9 (26)
Grade 2	7 (12)	3 (9)
Grade 3	0 (0)	7 (20)
Liver	22 (39)	12 (34)	0.94a
Grade 1	9 (16)	5 (14)
Grade 2	12 (21)	1 (3)
Grade 3	1 (2)	6 (17)
Lungs	5 (9)	0 (0)	0.15 b
Fascia	5 (9)	1 (3)	0.40 b
GU	2 (4)	1 (3)	>0.99 b
Other	23 (40)	12 (34)	0.66 b
Table 2B. At Maximum Severity
Skin	22 (39)	32 (91)	<0.001a
Grade 1	11 (19)	10 (29)
Grade 2	6 (11)	11 (31)
Grade 3	5 (9)	11 (31)
Mouth	48 (84)	29 (83)	>0.99 b
Eyes	28 (49)	18 (51)	>0.99 b
GI	19 (33)	21 (60)	0.005a
Grade 1	10 (18)	10 (29)
Grade 2	9 (16)	2 (6)
Grade 3	0 (0)	9 (26)
Liver	22 (39)	14 (40)	0.73a
Grade 1	8 (14)	6 (17)
Grade 2	12 (21)	2 (6)
Grade 3	2 (4)	6 (17)
Lungs	9 (16)	1 (3)	0.08 b
Fascia	8 (14)	1 (3)	0.15b
GU	4 (7)	2 (6)	>0.99b
Other	24 (42)	14 (40)	>0.99 b
*All p-values reported are nominal p-values with no adjustment for multiplicity of testing
aKruskal-Wallis test by ranks on the distributions of the ordered grades of cGVHD organ involvement
bFisher’s exact test on whether or not there was cGVHD involvement for specified organ system
