# Supplementary material for: Overlap chronic GVHD is associated with adverse survival outcomes compared to classic chronic GVHD
Source: Research Square preprint supplement (doi:10.21203/rs.3.rs-3243208/v1), 2023-08-21
Supplement: Supplementary file 4 [file 69cd331f7e7e87199e2e560a.xlsx]

## Sheet: Table 3
Table 3. Comparison of global cGVHD severity scores between the treatment arms (8/8 placebo vs. 8/8 ABA vs 7/8 ABA) at presentation and at maximum severity of cGVHD.
		Global cGVHD Severity Score
	Mild, no. (%)	Moderate, no. (%)	Severe, no. (%)	P value
Distribution at presentation:
8/8 placebo	9 (31)	12 (41)	8 (28)	0.53 (vs 8/8 ABA)
8/8 ABA	7 (19)	19 (53)	10 (28)
7/8 ABA	4 (14)	15 (54)	9 (32)	0.69 (vs 8/8 ABA)
Distribution at maximum:
8/8 placebo	4 (14)	17 (59)	8 (28)	0.94 (vs 8/8 ABA)
8/8 ABA	5 (14)	19 (53)	12 (33)
7/8 ABA	3 (11)	13 (46)	12 (43)	0.58 (vs 8/8 ABA)
