# Supplementary material for: Overlap chronic GVHD is associated with adverse survival outcomes compared to classic chronic GVHD
Source: Research Square preprint supplement (doi:10.21203/rs.3.rs-3243208/v1), 2023-08-21
Supplement: Supplementary file 5 [file 9bff0fe384c1385fa08b5b22.xlsx]

## Sheet: Tabls 4
Table 4. Comparison of key survival outcomes between classic cGVHD and ocGVHD.
	Classic cGVHD N=57	ocGVHD N=35	p-value
OS survival probability, % (95% CI)			0.0031
1-year	100	83 (65-92)
2-year	92 (77-97)	64 (43-80)
DFS survival probability, % (95% CI)			0.0141
1-year	100	83 (65-92)
2-year	84 (67-92)	65 (44-80)
NRM cumulative incidence, % (95% CI)			0.0682
1-year	0	17 (7-32)
2-year	8 (2-20)	26 (12-43)
Relapse cumulative incidence, % (95% CI)			0.2322
1-year	0	0
2-year	8 (2-20)	9 (1-25)
1Log-rank test for equality of survival functions including all follow-up
2Gray’s test for equality of cumulative incidence functions
