# Supplementary material for: Overlap chronic GVHD is associated with adverse survival outcomes compared to classic chronic GVHD
Source: Research Square preprint supplement (doi:10.21203/rs.3.rs-3243208/v1), 2023-08-21
Supplement: Supplementary file 6 [file be42fbbb58658d069b50d62d.xlsx]

## Sheet: supp table 4
Supplemental Table 4. Global cGVHD severity score distribution comparing classic cGVHD to ocGVHD at diagnosis within the 8/8 cohort (8/8 Placebo vs 8/8 ABA).
	Mild, no. (%)	Moderate, no. (%)	Severe, no. (%)	P value
Classic cGVHD at diagnosis:
8/8 Placebo	7 (35)	10 (50)	3 (15)	0.77
8/8 ABA	5 (23)	12 (55)	5 (23)
ocGVHD at diagnosis:
8/8 Placebo	2 (22)	2 (22)	5 (56)	0.45
8/8 ABA	2 (14)	7 (50)	5 (36)
