# Supplementary material for: Overlap chronic GVHD is associated with adverse survival outcomes compared to classic chronic GVHD
Source: Research Square preprint supplement (doi:10.21203/rs.3.rs-3243208/v1), 2023-08-21
Supplement: Supplementary file 7 [file dd8e0dba9e160e4bd2a1fbf5.xlsx]

## Sheet: supp table 1
Supplemental Table 1. The diagnostic and distinctive features of cGVHD in patients with ocGVHD.
Diagnostic/Distinctive features of cGVHD (N=35)	Number (%) of patients affected
Mouth lichen planus-like changes	28 (80)
Skin lichen planus-like features	1 (3)
Skin and mouth lichen planus-like changes	1 (3)
Mouth lichen planus-like changes, joint stiffness	1 (3)
Mouth ulcerations, endoscopy with ulcerations. Biopsy consistent with cGVHD	1 (3)
Vaginal scarring, evaluated by GYN	1 (3)
New onset dry/gritty eyes, diagnosed as cGVHD via ophthalmology	1 (3)
Myositis	1 (3)
