# Supplementary material for: Overlap chronic GVHD is associated with adverse survival outcomes compared to classic chronic GVHD
Source: Research Square preprint supplement (doi:10.21203/rs.3.rs-3243208/v1), 2023-08-21
Supplement: Supplementary file 8 [file e5f0ce787bd52aa3ed360d04.xlsx]

## Sheet: supp table 3
Supplemental Table 3. Acute GVHD components in ocGVHD patients at diagnosis.
Blinded patient ID	HCT cohort	Onset classification of ocGVHD	NRM (Y/N)	cGVHD severity at diagnosis	cGVHD score at diagnosis	aGVHD stage at diagnosis
17	7/8 ABA	Progressive	N	Moderate	Skin 1	Skin 2
18	7/8 ABA	Interrupted	Y	Severe	Mouth 2	Skin 2; Lower GiI 4
36	7/8 ABA	De novo	Y	Severe	Mouth 2; Eyes 1	Skin 1; Lower GI 2
78	7/8 ABA	interrupted	N	Moderate	Skin 1; Mouth 1; GI 1; Liver 1	Skin 1
88	7/8 ABA	De novo	N	Moderate	Mouth 1; Eyes 1	Lower GI 1
91	7/8 ABA	Interrupted	Y	Severe	Mouth 1; Eyes 1	Skin 2; Upper GI 1; Lower GI 4; Liver 4
94	7/8 ABA	Progressive	N	Severe	Skin 3; Mouth 3; Eyes 1; GI 3; Liver 1	Lower GI 4
101	7/8 ABA	Interrupted	Y	Severe	Mouth 1; Liver 3	Upper GI 1; Lower GI 4; Liver 2
102	7/8 ABA	Interrupted	N	Severe	Mouth 1; GI 1; Other (performance status) 1	Skin 3
146	7/8 ABA	Interrupted	N	Moderate	Mouth 1	Skin 2
148	7/8 ABA	Progressive	Y	Severe	Mouth 2; Eyes 2	Skin 2; Upper GI 1; Lower GI 2; Liver 4
171	7/8 ABA	interrupted	N	Severe	Mouth 1; Eyes 1	Skin 3
4	8/8 ABA	Progressive	N	Severe	Mouth 2; Eyes 1	Skin 2; Lower GI 1
9	8/8 ABA	De novo	N	Severe	Mouth 1	Skin 3
37	8/8 ABA	Interrupted	N	Moderate	Mouth 2; Other (performance score) 2	Skin 2
38	8/8 ABA	Progressive	N	Severe	Mouth 1	Skin 3; Upper GI 1; Lower GI 3
39	8/8 ABA	Interrupted	N	Moderate	Mouth 2	Skin 3
42	8/8 ABA	Interrupted	N	Moderate	Mouth 1; Eyes 1; GI 2; Fascia 1	Skin 1
86	8/8 ABA	Interrupted	N	Moderate	Mouth 1; Eyes 1; GI 1	Skin 1
119	8/8 ABA	Progressive	N	Moderate	Mouth 1; Eyes 1; GI 1; Liver 2; Other (Eosinophilia) 1	Skin 2
123	8/8 ABA	Progressive	N	Severe	Mouth 1; Other (eosinophilia) 1	Skin 3; Upper GI 1
124	8/8 ABA	Interrupted	N	Mild	Eyes 1	Skin 1
128	8/8 ABA	Progressive	N	Moderate	Mouth 1; Eyes 1	Skin 1
141	8/8 ABA	Progressive	N	Mild	Skin 1; Mouth 1	Skin 1
158	8/8 ABA	Progressive	Y	Severe	Eyes 2	Lower GI 2; Liver 4
170	8/8 ABA	Interrupted	N	Severe	Other (myositis) 3	Lower GI 3
11	8/8 Placebo	Progressive	Y	Severe	Mouth 1; Eyes 1	Skin 1; Lower GI 4; Liver 3
13	8/8 Placebo	progressive	N	Severe	Mouth 1; Other (performance score) 1	Skin 3; Upper GI 1
22	8/8 Placebo	Progressive	N	Moderate	Mouth 1; Eyes 1; Liver 1; Other (eosinophilia) 1	Skin 2
76	8/8 Placebo	interrupted	N	Mild	Liver 1; Other (eosinophilia) 1	Skin 2
108	8/8 Placebo	Progressive	N	Severe	Mouth 1; Eyes 2; Liver 1; Other (performance status) 1	Skin 3
117	8/8 Placebo	Progressive	N	Severe	Mouth 1	Skin 1; Upper GI 1; Lower GI 1
120	8/8 Placebo	Progressive	N	Moderate	Mouth 2; Eyes 1; GI 1; Other (performance status) 2	Skin 2
125	8/8 Placebo	De novo	N	Severe	GU 3	Skin 1
159	8/8 Placebo	Progressive	Y	Severe	Mouth 1	Skin 3; Liver 4
