# Supplementary material for: Overlap chronic GVHD is associated with adverse survival outcomes compared to classic chronic GVHD
Source: Research Square preprint supplement (doi:10.21203/rs.3.rs-3243208/v1), 2023-08-21
Supplement: Supplementary file 9 [file fe05f1b907a3148d373495f5.xlsx]

## Sheet: supp table 5
Supplemental Table 5. Classic cGVHD vs ocGVHD outcomes separated by placebo versus ABA cohorts.
	Classic cGVHD	ocGVHD	P value
8/8 Placebo	N=20	N=9
OS, % (confidence interval)			0.0041
1-year	100	78 (37-94)
2-year	89 (43-98)	39 (1-81)
DFS, % (confidence interval)			0.0031
1-year	100	78 (37-94)
2-year	89 (43-98)	39 (1-81)
8/8 ABA	N=22	N=14
OS, % (confidence interval)			0.7401
1-year	100	93 (59-99)
2-year	89 (64-97)	84 (48-96)
DFS, % (confidence interval)			0.6981
1-year	100	93 (59-99)
2-year	74 (48-88)	84 (50-96)
1Log-rank test for equality of survival functions
